# Supplementary material for: SlPIN1 regulates auxin efflux to affect flower abscission process
Source: PubMed Central journal article supplement (PMC5668252; doi:10.1038/s41598-017-15072-7), 2017-11-02
Supplement: 41598_2017_15072_MOESM1_ESM.pdf [file 41598_2017_15072_MOESM1_ESM.pdf]

# SIPIN1 regulates auxin efflux to affect flower abscission process

Zihang Shi<sup>1,2\*</sup>, Yun Jiang<sup>1,2\*</sup>, Xinqi Han<sup>1,2</sup>, Xin Liu<sup>1,2</sup>, Ruishu Cao<sup>1,2</sup>, Mingfang Qi<sup>1,2</sup>, Tao Xu<sup>1,2</sup> & Tianlai Li<sup>1,2</sup>

1 College of Horticulture, Shenyang Agricultural University, Shenyang 110866, Liaoning, People' s Republic of China. 2 Key Laboratory of Protected Horticulture of Ministry of Education, No. 120 Dongling Road, Shenhe District 110866, People' s Republic of China.

\*These authors contributed equally to this work. Correspondence and requests for materials should be addressed to T.X. (email: syauxutao@qq.com) and T.L. (email: tianlaili@126.com)

## Supplementary information

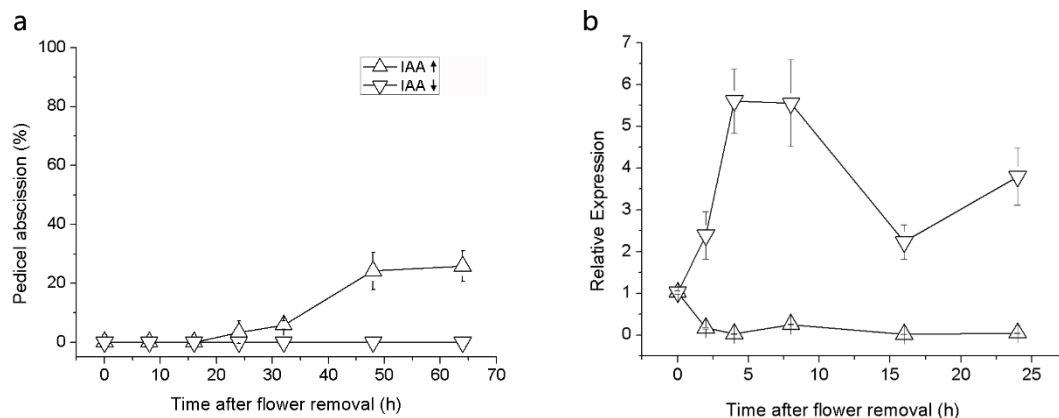

**Supplementary Figure S1. Abscission process and *SIPIN1* expression profiles following the IAA treatments at different ends.** The arrows indicate the opposite directions of incubation. The data are presented as the mean ( $\pm$  SD) values corresponding to three independent tests. For each test of abscission rate, 40 to 50 pedicels were investigated.

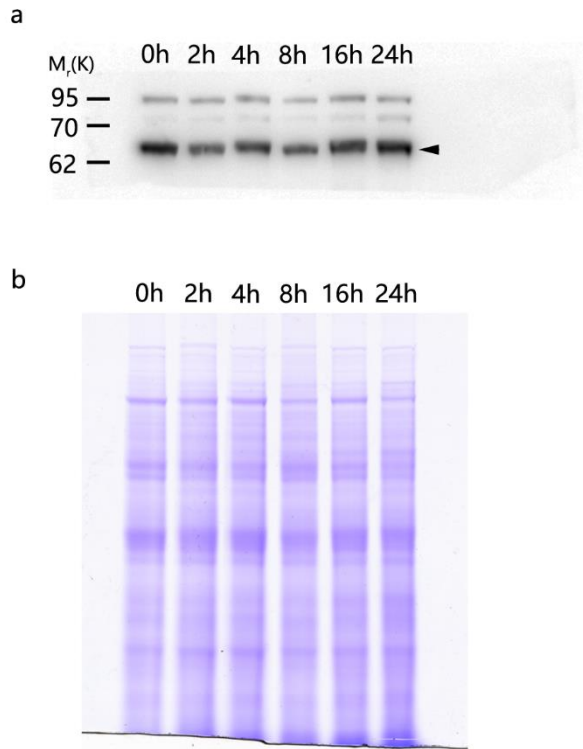

**Supplementary Figure S2. Full-length images in SIPIN1 western blotting experiments.** a, SIPIN1 western blotting of the AZ protein samples as described in Fig. 3 a. A specific signal among the 62-70 KD (arrowhead) was detected. b, the Coomassie-staining of the AZ protein samples.

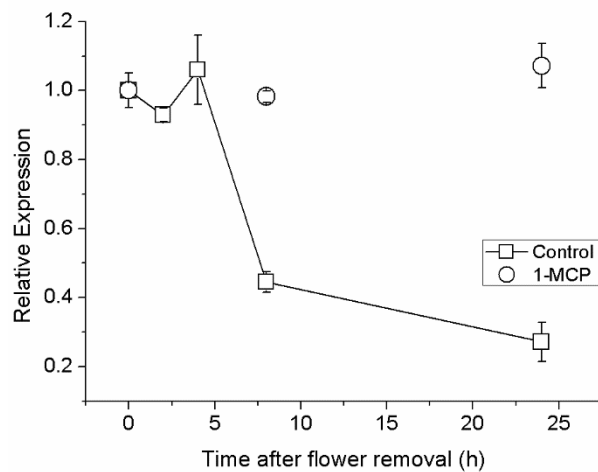

**Supplementary Figure S3. *FEI2* expression profiles in the AZ during abscission.** *FEI2* expression decreased at 8-24 h after flower removal, while 1-MCP treatment prevented the down-regulation of *FEI2* during abscission. The data are presented as the mean ( $\pm$  S D) values corresponding to three independent tests.

**Supplementary Table S1. Primers used in this study**

| Primer name                                                            | Sequence (5' -3' )                           |
|------------------------------------------------------------------------|----------------------------------------------|
| Forward primer of <i>SIPIN1</i> for RT-PCR                             | CAGGCAGCTCTACCACAAGG                         |
| Reverse primer of <i>SIPIN1</i> for RT-PCR                             | TGTAATCGGCAACGCAATC                          |
| Forward primer of <i>FEI2</i> for RT-PCR                               | TCTGGTCTCCACTGCTCAAGA                        |
| Reverse primer of <i>FEI2</i> for RT-PCR                               | CCAAGGGAACCGTAGCACAG                         |
| Forward primer for vector pSPT19 construction (Eco RI)                 | GG <u>GAAATTC</u> ACTTATTGTTCTTGGGGTTCTTGCT  |
| Reverse primer for vector pSPT19 construction (Hind III)               | GG <u>AAGCTT</u> TTTTCCATCTTCTTTAACTCTGCT    |
| Forward primer of <i>SIPIN1</i> for VIGS construction (Eco RI)         | CCG <u>GAAATTC</u> TGGTACTGCTGGGAGAACTCAAAC  |
| Reverse primer of <i>SIPIN1</i> for VIGS construction (BamHI)          | CGC <u>GGATCC</u> GCTTTGTTGCCATTGTTACTAGGTG  |
| Forward primer of <i>SIPIN1</i> for bait construction of Y2H (Eco RI)  | CCG <u>GAAATTC</u> AGAGGTGCAAGACTGCTAATTTCT  |
| Reverse primer of <i>SIPIN1</i> for bait construction of Y2H (BamHI)   | CGC <u>GGATCC</u> GGACTGTGCAATTATAGCAGGC     |
| Forward primer of <i>SIPIN1</i> for vector construction of BiFC (KpnI) | CGG <u>GGTACC</u> AGAGGTGCAAGACTGCTAATTTCT   |
| Reverse primer of <i>SIPIN1</i> for vector construction of BiFC (SpeI) | CGG <u>ACTAGT</u> GGACTGTGCAATTATAGCAGGC     |
| Forward primer of <i>PP2C</i> for vector construction of BiFC (KpnI)   | CGG <u>GGTACC</u> ATGACTGGAGGCAAAGAAATCATCG  |
| Reverse primer of <i>PP2C</i> for vector construction of BiFC (Eco RI) | CCG <u>GAAATTC</u> TTGGAACCTTACAACACTACGCAGG |

**Supplementary Table S2. Phosphopeptides of SIPIN1**

| Phosphorylated peptide and site (in lowercase) | pRS   | Mascot | Relative quantity |        |
|------------------------------------------------|-------|--------|-------------------|--------|
|                                                | Score | Score  | 12h/0h            | 24h/0h |
| DDFsFANR                                       | 108   | 35     | 0.582             | 0.378  |
| FNNYHGGAAPQsNsNtHyPAPNPGMFsPsNNGNk             | 57    | 11     | 0.700             | 0.761  |
